# An Adaptive Geometric Search Algorithm for Macromolecular Scaffold Selection

TIAN JIANG<sup>1,\*</sup>, P. DOUGLAS RENFREW<sup>2,3,\*</sup>, KEVIN DREW<sup>2,4</sup>, NOAH  
YOUNGS<sup>3</sup>, GLENN BUTTERFOSS<sup>2</sup>, DENNIS SHASHA<sup>\*1</sup>, AND RICHARD  
BONNEAU<sup>†1,2,3</sup>

<sup>1</sup>*Courant Institute of Mathematical Sciences, Computer Science Department, New York  
University, New York, NY 10009, USA*

<sup>2</sup>*Center for Genomics and Systems Biology, Department of Biology, New York University, New  
York, NY 10009, USA*

<sup>3</sup>*Simons Center for Data Analysis, Simons Foundation, New York, NY 10010, USA*

<sup>4</sup>*Center for Systems and Synthetic Biology, Institute for Cellular and Molecular Biology,  
University of Texas at Austin, Austin, TX, USA*

*\*These authors contributed equally*

January 10, 2017

## Abstract

A wide variety of protein and peptidomimetic design tasks require matching functional three-dimensional motifs to potential oligomeric scaffolds. Enzyme design, for example, aims to graft active-site patterns typically consisting of 3 to 15 residues onto new protein surfaces. Identifying suitable proteins capable of scaffolding such active-site engraftment requires costly searches to identify protein folds that can provide the correct positioning of side chains to host the desired active site. Other examples of biodesign tasks that require simpler fast exact geometric searches of potential side chain positioning include mimicking binding hotspots, design of metal binding clusters and the design of modular hydrogen binding networks for specificity. In these applications the speed and scaling of geometric search limits downstream design to small patterns. Here we present an adaptive algorithm to searching for side chain take-off angles compatible with an arbitrarily specified functional pattern that enjoys substantive performance improvements over previous methods. We demonstrate this method in both genetically encoded (protein) and synthetic (peptidomimetic) design scenarios. Examples of using this method with the Rosetta framework for protein design are provided but our implementation is compatible with multiple protein design frameworks and is freely available as a set of python scripts (<https://github.com/JiangTian/adaptive-geometric-search-for-protein-design>).

**Keywords:** foldamer, octree, enzyme design, loop modeling, metal binding

---

\*shasha@courant.nyu.edu

†rbonneau@simonsfoundation.org

## 36 1 Introduction

37 The field of protein design has advanced tremendously in the recent decade in scale,  
38 accuracy and the number of types of design tasks carried out by practitioners. Early  
39 successes in protein design focused on protein fold design (including novel folds)[1]  
40 and hyper-stabilisation of proteins[2]. The redesign of protein-protein[3] and protein-  
41 DNA[4] interfaces allows for functional rewiring of key biological networks. More  
42 recently, protein engineers have turned towards the redesign of protein active sites and  
43 smaller functional patterns that demand sub-angstrom accuracy in the positioning of key  
44 side chains. Recent works include both the engraftment of known active sites onto new  
45 scaffolds[5] as well as the engraftment of novel active sites (derived from quantum me-  
46 chanical modeling of desired reactions and corresponding transition states)[6] onto new  
47 scaffold proteins. In these enzyme design applications, active site patterns can become  
48 quite large as substrate binding, reaction mechanism, and surrounding environment  
49 are considered. Methods for matching known and predicted functional sites onto large  
50 libraries of potential scaffolds (proteins, nucleic acids and synthetic peptidomimetics for  
51 example) are needed to enable enzyme design (and other related design tasks involving  
52 functional site or hotspot transplantation).

53 The earliest geometric matching applications in bioinformatics were aimed at match-  
54 ing whole sub-structures to find substructures that indicated a likelihood of shared  
55 function or distant homology[7]. In many cases these algorithms searched for con-  
56 tiguous regions and were the structural analog of sequence alignment algorithms (both  
57 gapped and ungapped). Early uses included protein function prediction, analysis of  
58 structure prediction and evaluation of new algorithms[8–10]. Early works also included  
59 innovative uses of geometric hashing to extract 3D functional motifs from protein struc-  
60 tures[11]. Here we focus on the use of geometric search for the purpose of biodesign,  
61 rather than prospecting or annotation.

62 Geometric searches in biodesign and bioinformatics contexts having similar moti-  
63 vation to the work described here have used combinations of geometric hashing, side  
64 chain conformation libraries and other heuristics that have typically limited the number  
65 of elements in any given pattern. Fleishman et al. computationally designed a protein  
66 to bind hemagglutinin (HA) targeting a conserved region on the stem[12]. They first  
67 identified residues that were likely to be hotspot residues by docking the single amino  
68 acid onto the HA stem region and calculating a binding energy. Next, they built inverse  
69 rotamer libraries for residues with good binding energies, then used the residues as  
70 anchor sites on which to dock protein scaffolds. The protein scaffolds were selected  
71 from known proteins not known to bind HA and were filtered for high shape comple-  
72 mentarity with the HA target region. A low resolution docking procedure was used to  
73 simultaneously optimize the HA-scaffold binding energy as well as the scaffold's ability  
74 to accommodate anchor residues. Scaffolds that showed good binding energies with the  
75 satisfied hotspot residues were used as the starting point for a second round of docking  
76 and designing to optimize residues outside of the hotspot residues.

77 In addition to these examples of geometric search-driven enzyme design, there are  
78 several examples in the field of biomimicry with synthetic oligomeric foldamers and  
79 short peptidomimetic scaffolds. Here the objectives vary considerably: in active-site  
80 mimicry, interface binding, metal binding and surface adhesion[13] are a few of the  
81 diverse peptidomimetic design tasks. The set of oligomeric scaffolds that have protein-  
82 like side chain take-off angles is quite diverse; examples include linear peptoids[14],  
83 oligoaxipiperazines (OOPs)[15], HBS helices[16], cyclic peptides[17] and peptoids[18],  
84  $\beta$ -peptides[19] and hybrids thereof. A key application here is the mimicry of interfacial

85 hotspots where a small number of side chains scaffolded by a single secondary structure  
86 element comprise a significant fraction of the binding energy[20]. In these cases moving  
87 these groups of side chains to a new, non-protein, scaffold with synthetically restricted  
88 backbone degrees of freedom and reduced atomic mass is a viable route to inhibiting  
89 protein interactions. Drew et al. show that by grafting 4 side chains from a restricted  
90 segment of sequence onto a four subunit OOP scaffold resulted in low nanomolar  
91 inhibitors of two key protein-protein interactions (p53-MDM2 and p300-Hif1 $\alpha$ )[21].  
92 The first step in this work was using a geometric search to dock the OOP scaffold into  
93 the binding site such that side chain takeoff angles were compatible with those observed  
94 for three hotspot residues observed in the structure (predicted to comprise the majority  
95 of the binding energy). After this geometric search was used to instantiate a starting  
96 pose, the Rosetta design procedure (with modifications for both NCAA side chains and  
97 the OOP backbone) was used to optimise binding and inhibition of the endogenous  
98 protein-protein interaction, resulting in low nanomolar inhibitors of both complexes. In  
99 both of these cases, the geometric match steps were based on inverse rotamers and were  
100 prohibitively expensive, limiting the search to only small peptidomimetics.

101 Drew and Renfrew et al. previously demonstrated the incorporation of several non-  
102 peptidic backbone chemistries in the the macromolecular modeling suite, Rosetta[22].  
103 There are many additional abiotic foldamer and peptidomimetic backbone bones[23]  
104 that are amenable to such treatment. Determining which foldamer backbone (or hybrid  
105 chemistry) is the most compatible with a given interface will become a bottleneck as the  
106 number of synthetically accessible scaffolds for biomimicry continue to increase.

107 Here we describe a new method combining octrees (a data structure that maps regions  
108 of 3-dimensional space to nodes in a tree) and a novel adaptive search that results in  
109 a significant performance gain for the applications described above. Key innovations  
110 include the ability to weight interaction/pattern components by energy and the adaptive  
111 nature of the search, which both increase efficiency and allow for specification of  
112 allowable error (per component of the template pattern) and number of mismatches. We  
113 pose the problem by describing a typical problem setup. We then describe our core  
114 algorithm. Lastly, we describe applications to protein and peptidomimetic design tasks  
115 like those described above.

## 116 2 Methods

### 117 2.1 Problem Setup

118 Here we describe a method that, given a set of side chain functional groups that are  
119 fixed in space, will find a molecular *scaffold* among a library of scaffolds that will  
120 accommodate those fixed *functional groups*. Here, we use the term functional group  
121 to describe the terminal atoms of a side chain, i.e. those atoms whose position will  
122 remain fixed relative to one another during the rotation of the  $\chi$  angles of the side chain.  
123 These would include the phenyl, imidazol, and guanadinium groups of phenylalanine,  
124 histidine and arginine respectively, but also the four terminal carbons of leucine (C $\beta$ , C $\gamma$ ,  
125 C $\delta$ 1, C $\delta$ 2) and the hydrogens that branch from them. A molecular scaffold is defined  
126 generally as any molecule from which designable side groups could branch.

127 A given scaffold will typically have varying degrees of freedom and these degrees  
128 of freedom will therefore define the scaffold's ability to accommodate fixed functional  
129 groups. Practically, different scaffolds will have different degrees of flexibility at  
130 different positions and this will drive our definition of allowable error of matching. For

131 a peptide the degrees of freedom are the  $\varphi$  and  $\psi$  angles on the backbone and  $\chi$  angles  
132 in the side chains. Peptidomimetic scaffolds will have different/additional degrees of  
133 freedom. For example, for a peptoid we must also consider the preceding- $\omega$  angle which  
134 potentially allows for greater diversity of side chain  $C\alpha-C\beta$  bond vectors for a given  
135 sequence. Alternatively, an oligoioxopiperazine (OOP), which has cyclic constraints  
136 between neighboring residues, is theoretically much more restricted in its ability to  
137 accommodate fixed functional groups but also has a reduced entropic cost upon binding  
138 a target.

139 Our approach to interface design is be part of a two-step process. In the first  
140 step, we consider the most influential energies and conduct an efficient geometric  
141 search to eliminate all the impossible designs. In a second step, designs that passed  
142 the quick initial screening are further refined using Rosetta, potentially introducing  
143 additional mutations. This two-step process efficiently saves all the time that the  
144 majority impossible designs would take to be evaluated by Rosetta. The second step in  
145 this process

## 146 **2.2 Current Hotspot Matching Algorithm**

147 For comparison we adapted the approach of Flieshmann et al. Our implementation of  
148 scaffold matching for proteins is quite similar to the above described approach. This  
149 approach is broken into three stages as follows:

150 A. Identify hotspot residues at the interface of a protein interaction subject to the  
151 constraint that the residues are not part of the target protein. Hotspot residues are  
152 generally chosen based on high  $\Delta\Delta G$  values in their alanine scans. Such residues are  
153 often responsible for the protein interaction's binding affinity.

154 B. For each hotspot residue, generate an inverse rotamer library which specifies high  
155 probability orientations of backbone atoms and other atoms not included in the residue's  
156 fixed function group. The inverse rotamer library defines possible connection points to  
157 the molecular scaffold of interest.

158 C. For every designable residue position on a given molecular scaffold a. identify a  
159 primary hotspot residue generally chosen as the residue with the highest  $\Delta\Delta G$  value  
160 from the alanine scanning results b. Align the designable residue position on the scaffold  
161 with an inverse rotamer in the library of primary hotspot residue inverse rotamers c.  
162 Sample the scaffold's degrees of freedom to minimize an energy function as well as  
163 the distance between remaining designable residue positions on the scaffold and the  
164 remaining hotspot residues. In practice, a distance constraint is placed between the  
165 atoms at the designable residue positions on the scaffold and the corresponding atoms in  
166 the inverse rotamers of hotspot residues and is incorporated into the energy function to  
167 evaluate the entire system. d. Save lowest energy conformations and filter for scaffolds  
168 that accommodate multiple hotspot residues.

## 169 **2.3 Overview of Adaptive Geometric Search Algorithm**

170 Here we employ octrees as the core data-structure for our algorithm[24]. A cubic  
171 volume, with sides of length  $l$ , centered on a point,  $p$ , can be subdivided in to eight  
172 cubes with sides of length  $l/2$ , that share  $p$  as a vertex. Each of these eight cubes can  
173 be further subdivided in to eight more cubes each with side of length  $l/4$ , and so on.  
174 This decomposition of 3D space lends it itself toward a tree like representation called  
175 an octree. Octrees are tree structures whose nodes correspond to 3D cubes embedded  
176 in a hierarchically subdivided overall 3D space and each deepening level of the tree

177 describes an increasingly smaller volume of space. Each node has eight children by  
178 subdividing each side of the cube by the middle in the  $x$ ,  $y$  and  $z$  dimensions. All the  
179 3D objects are stored in the leaf nodes in the octrees. Octrees have various stopping  
180 criteria to stop the tree from splitting including thresholding based on the number of  
181 objects in a node, i.e. the octree splits only the nodes containing more than a certain  
182 number of objects. For our problem the 3D objects are points in 3D space and the  
183 stopping criterion is the minimum cube length  $\ell_s$ . That is, the octree splits a node only  
184 if its corresponding cube has sides of length at least  $2\ell_s$ . Moreover, all empty nodes, i.e.  
185 nodes whose corresponding cubes contain no points, in the octrees are discarded.

186 To search for desirable configurations, the algorithm first samples points from each  
187 manifold (corresponding to a take-off point) and then builds an octree for each manifold  
188 based on these sample points with the stopping criterion of the minimum cube length  $\ell_s$ .  
189 Then the algorithm compares two octrees at a time by searching adaptively in the cubic  
190 regions that pass the necessary condition **A** (see below). We call a pair of cubes that  
191 pass the necessary condition **A** a “possible pair”. The algorithm finds all the possible  
192 cube pairs at each level until it ends up with the set of all possible pairs of leaf cubes.  
193 Then the sufficient condition **A** (see below) is tested on all these pairs of leaf cubes to  
194 determine whether to accept or reject all the pairs of points inside them. At the end all  
195 the pairwise desirable cubes are combined through a matrix product.

## 196 **2.4 Establishing Necessary and Sufficient Conditions for matching**

197 Our overall strategy is to enumerate all possible residue positions (when there is a  
198 choice) and amino acid assignments to these residues and then to use the adaptive  
199 geometric algorithm to determine whether the resulting rotamers at those positions have  
200 the proper geometry. Thus the adaptive geometric algorithm is the “inner loop” of the  
201 computation. For this inner loop to be efficient, it must swiftly filter away impossible  
202 geometries (theorem 1 below) and identify promising ones (theorem 2 below).

203 Mathematically, the adaptive geometric algorithm efficiently searches for a certain  
204  $n$ -polygon among  $n$  sets of points in 3D space given an error tolerance and an approxi-  
205 mation margin. This general scheme is required for all the applications introduced above  
206 and evaluated in the Results section. Given a target polygon  $\mathcal{P} = \{P_1, P_2, \dots, P_n\}$ , a  
207 tolerance  $\epsilon_T \geq 0$  and one edge  $(P_i, P_j)$ , let  $\mathcal{C}_i, \mathcal{C}_j$  be two nonempty cubes with size  
208  $\ell$  and the distance between their centers  $d$ , where  $i, j \in [1, 2, \dots, n], i \neq j$ . Then we  
209 have the following theorems that help us determine which cubes could possibly match  
210 that edge. That is, the theorems provide acceptance and rejection criteria for pairs of  
211 cubes from different manifolds (where each manifold corresponds to, for example, a  
212 take-off residue from a backbone). The first theorem provides a rejection criterion.

213 **Theorem 1.** *If  $d < P_i P_j - \epsilon_T - \sqrt{3}\ell$  or  $d > P_i P_j + \epsilon_T + \sqrt{3}\ell$ , then there are no*  
214 *pairs of points  $(G, H) \in \mathcal{C}_i \times \mathcal{C}_j$  such that  $|GH - P_i P_j| \leq \epsilon_T$ .*

215 *Proof.* See Appendix **A**. □

216 Theorem 1 suggests a “necessary condition” for any two cubic regions on the same  
217 level of the trees to contain any desirable pairs of points. We are going to call it the  
218 “necessary condition 1” in the future to refer to the condition defined in Theorem 1. If  
219 two cubes do not satisfy the conditions of this theorem, they are not going to match the  
220 edge, and will be rejected. That’s why we consider this to be a rejection condition. By  
221 contrast, we have the following “sufficient condition 2” for all pairs of points from two  
222 leaf cubes to be desirable (an acceptance condition).

223 **Theorem 2.** *If  $P_i P_j - \epsilon_T + \sqrt{3} \ell \leq d \leq P_i P_j + \epsilon_T - \sqrt{3} \ell$ , then all pairs of points*  
 224  *$(G, H) \in \mathcal{C}_i \times \mathcal{C}_j$  satisfy  $|GH - P_i P_j| \leq \epsilon_T$ .*

225 *Proof.* See Appendix A. □

226 Notice that the condition of Theorem 2 can hold only when  $P_i P_j - \epsilon_T + \sqrt{3} \ell \leq$   
 227  $P_i P_j + \epsilon_T - \sqrt{3} \ell$ , or when  $\ell \leq \epsilon_T / \sqrt{3}$ . Because the leaf cubes of the octrees must  
 228 have length  $\ell_T \leq 2\ell_s$ , we require  $\ell_s \leq \epsilon_T / (2\sqrt{3})$ .

229 Let  $t_i$  be the octree generated from manifold  $\mathcal{A}_i$  for  $i = 1, 2, \dots, n$ . Algorithm 1  
 gives the pseudo code of the adaptive geometric search algorithm.

---

**Algorithm 1** Adaptive Geometric Search ( $\{\mathcal{A}_1, \mathcal{A}_2, \dots, \mathcal{A}_n\}, \mathcal{P}, \epsilon_T$ )

---

```

1: trees = [ $t_1, t_2, \dots, t_n$ ]
2:  $h$  = depth of the octrees  $t_i$  for  $i = 1, 2, \dots, n$ 
3: for  $i, j \in [1, 2, \dots, n], i \neq j$  do
4:   pairs = []
5:    $l^* = P_i P_j$ 
6:   combos = [[] for  $x$  in range( $h + 1$ )]
7:   combos[0] = [ $(t_i, t_j)$ ]
8:   for  $k \in [1, 2, \dots, h]$  do
9:     for  $(b_0, b_1)$  in combos[ $k$ ] do
10:      combos[ $k + 1$ ] += Compare1( $b_0, b_1, l^*, \epsilon_T$ )
11:    end for
12:  end for
13:  for  $(b_0, b_1)$  in combos[ $h$ ] do
14:    pairs += Compare2( $b_0, b_1, l^*, \epsilon_T$ )
15:  end for
16:  Append all  $(p, q) \in$  pairs as edges to the graph  $G$ 
17: end for
18: Search  $G$  for the desirable polygon

19: # Check the necessary condition 1
20: function COMPARE1( $b_0, b_1, l^*, \epsilon_T$ )
21:   return [ $(c_i, c_j)$  for  $(c_i, c_j)$  in  $b_0.children \times b_1.children$  if
    |(  $c_i.center, c_j.center$ ) -  $l^*$ |  $\leq \epsilon_T + \sqrt{3} c_i.length$ ]
22: end function

23: # Check the sufficient condition 2
24: function COMPARE2( $b_0, b_1, l^*, \epsilon_T$ )
25:   if |(  $b_0.center, b_1.center$ ) -  $l^*$ |  $\leq \epsilon_T - \sqrt{3} b_0.length$  then
26:     return [ $(b_0, b_1)$ ]
27:   else
28:     return []
29:   end if
30: end function

```

---

230

## 231 2.5 Algorithmic Complexity

232 The adaptive geometric search algorithm has three parts, building the octrees, adaptively  
 233 searching every two octrees and the graph search. Let  $N$  be the number of sample points

234 from each manifold. For convenience we build all octrees with the same initial cube  
 235 length  $\ell_0$ . The time complexity of building an octree with initial cube length  $\ell_0$  and  
 236 minimum cube length  $\ell_s$  is  $\mathcal{O}(\log_2(\ell_0/\ell_s)N)$ .

237 Next we compute the time complexity of the adaptive search between any two  
 238 octrees (without loss of generality) called  $t_1, t_2$ . Let the corresponding polygon edge  
 239 length be  $l^*$ .

240 **Theorem 3.** *If we set  $\ell_s = \eta \frac{\epsilon_T}{4\sqrt{3}}$  for any  $0 < \eta < 1$ , then the adaptive geometric  
 241 search algorithm 1 returns all the pairs of points whose distances are within the set  
 242  $[\ell^* - (1 - \eta)\epsilon_T, \ell^* + (1 - \eta)\epsilon_T]$ , and some but possibly not all the pairs of points whose  
 243 distances are within the set  $[\ell^* - \epsilon_T, \ell^* - (1 - \eta)\epsilon_T] \cup (\ell^* + (1 - \eta)\epsilon_T, \ell^* + \epsilon_T]$ .*

244 *Proof.* See Appendix A. □

245 **Lemma 4.** *Set  $\ell_s = \eta \frac{\epsilon_T}{4\sqrt{3}}$  for some  $0 < \eta < 1$ . Then for any cube  $\mathcal{C}_1$  in an octree  $t_1$ ,  
 246 there are at most  $\frac{4\pi}{3} (3\sqrt{3} + 2\frac{4\sqrt{3}}{\eta}) \left( 3(\frac{\ell^*}{\ell_s})^2 + (\frac{3\sqrt{3}}{2} + \frac{4\sqrt{3}}{\eta})^2 \right)$  cubes  $\mathcal{C}_2$  on the same  
 247 level from another octree  $t_2$  such that  $(\mathcal{C}_1, \mathcal{C}_2)$  are possible pairs, that is, they satisfy the  
 248 necessary condition 1.*

249 *Proof.* See Appendix A. □

250 **Theorem 5.** *Recall that  $\ell_0$  denotes the initial cube length and the minimum cube length  
 251  $\ell_s = \eta \frac{\epsilon_T}{4\sqrt{3}}$ . Let  $n_m$  be defined as in Lemma A. Then the time complexity of the adaptive  
 252 search part of Algorithm 1 is  $\mathcal{O}\left(\frac{1}{\eta^6 \epsilon_T^5}\right)$ .*

253 *Proof.* See Appendix A. □

254 Now we consider the last part of the algorithm, the graph search. Let  $s_{ij}$  be the  
 255 number of possible leaf cube pairs between octrees  $t_i, t_j$  for  $i, j \in [1, 2, \dots, n], i < j$ .  
 256 We view the leaf cubes as vertices and possible pairs of them as undirected edges in the  
 257 graph. If we want to produce all the desirable n-tuple cubes, then by induction it's easy  
 258 to see that the upper bound on the time complexity is  $\mathcal{O}(\prod_{1 \leq i < j \leq n} s_{ij})$ .

259 In practice we can do much better. Consider building a directed graph by giving  
 260 directions to the edges to form a  $n$ -cycle of groups of cubes from  $t_1, t_2, \dots, t_n$ . Finding  
 261 strongly connected components in this directed graph first would in most cases greatly  
 262 reduce the search space with only a linear cost  $\mathcal{O}(\sum_{1 \leq i < j \leq n} s_{ij})$ .

In summary we state the total time complexity of the algorithm.

$$\begin{aligned} & \mathcal{O}\left(n \log_2\left(\frac{\ell_0}{\ell_s}\right)N + \frac{n^2}{\eta^6 \epsilon_T^5} + \prod_{1 \leq i < j \leq n} s_{ij}\right) \\ &= \mathcal{O}\left(n \log_2\left(\frac{4\sqrt{3} \ell_0}{\eta \epsilon_T}\right)N + \frac{n^2}{\eta^6 \epsilon_T^5} + \prod_{1 \leq i < j \leq n} s_{ij}\right) \\ &= \mathcal{O}\left(n \log_2\left(\frac{\ell_0}{\eta \epsilon_T}\right)N + \frac{n^2}{\eta^6 \epsilon_T^5} + \prod_{1 \leq i < j \leq n} s_{ij}\right). \end{aligned} \quad (1)$$

(2)

263 In practice we usually search for a triangle or a 4-sided polygon as the target polygon,  
 264 i.e.  $n = 3$  or  $4$ . When  $n = 3$ , depending on the parameters  $\eta, \epsilon$  and  $N$  the computation

265 time varies but all three terms in the complexity formula (4.1) are typically of the same  
266 order. When there are large numbers of possible pairs  $s_i$ 's and/or  $n = 4$ , the term  $\mathcal{C}(S)$   
267 in the last term of the complexity formula (4.1) becomes the dominating term. The  
268 number of results  $s_{ij}$ 's can be further reduced when we take optimal dihedral angles  
269 instead of uniform sampling from  $[0, 2\pi]$ .

## 270 3 Results

271 Our algorithm can be applied to many different problems in macromolecular modeling  
272 and design. In essence, it efficiently solves the problem of searching for a certain  
273  $n$ -polygon among  $n$  sets of points in 3D with error tolerance  $\epsilon$  and an approximation  
274 margin  $\eta$ . We present three use cases where our algorithm's improved efficiency (run  
275 times that are in some cases many thousands of times faster than previous approaches)  
276 improves the scaling of the overall task, enabling the use of larger template/target  
277 structural patterns.

### 278 3.1 Scaffold Matching: designing OOPs to inhibit MDM2-p53 in- 279 terface

280 Protein-protein interactions (PPI) mediate many cellular functions and a small number  
281 residues that make significant contributions to the the binding affinity of the PPI (deemed  
282 "hotspot" residues) in turn underlay these protein interfaces. Design tasks aimed at  
283 protein interfaces abound, for example Fleishman et al. previously designed a influenza  
284 hemagglutinin binder. Interest in using smaller, easy to synthesize, non-proteolyzable  
285 macromolecules (called foldamers) as potential therapeutic candidates continues to rise  
286 as these systems continue to become more computationally and synthetically accessible  
287 to a broader community. Foldamer backbone chemistries abound and finding a foldamer  
288 backbone type that is well matched to a particular set of interface hotspot residues  
289 interface will prove to be a future challenge. Here we describe the recapitulation of  
290 a OOP foldamer scaffold designed by Drew and coworkers that mimics P53 and can  
291 disrupt the P53/MDM2 interaction (Fig. 1D). Three hotspot residues on P53 contribute  
292 the majority of the binding affinity for MDM2 (Fig. 1A).

293 There are two parts of the algorithm. In step 1, we search through all possible  
294 backbones for a matching triangle to the target triangle. In step 2, for every match result  
295 from step 1 the connecting atom's bond angles are checked against the optimal bond  
296 angle. If a match passes step 2, it's returned as a final result. Otherwise we continue the  
297 iteration in step 1.

298 The target triangle is made up of  $C\beta$ 's of the hotspot residues (Fig. 1C). The  
299 algorithm simply searches through the possible take-off position combinations, four  
300 triangles in this example (Fig. 1B), from every backbone for a match in shape within the  
301 error bound. Notice that in this case all  $C\beta$ 's are fixed due to the short lengths of hotspot  
302 residues. With longer hotspot residues, there will be a manifold of all the possible  $C\beta$ 's  
303 for each hotspot residue. For every possible triplet of take-off positions, there are eight  
304 possible D and L enantiomers. So, for each of these 32 possibilities, we apply adaptive  
305 geometric search to find all the matches.

306 Once we have the matching shapes, we calculate the corresponding matrices  $R$ 's of  
307 rotation and translation such that after applying these transformations  $R$ 's backbones  
308 are connected onto the hotspot residues at atoms  $C\beta$ 's. Finally we just check if the bond



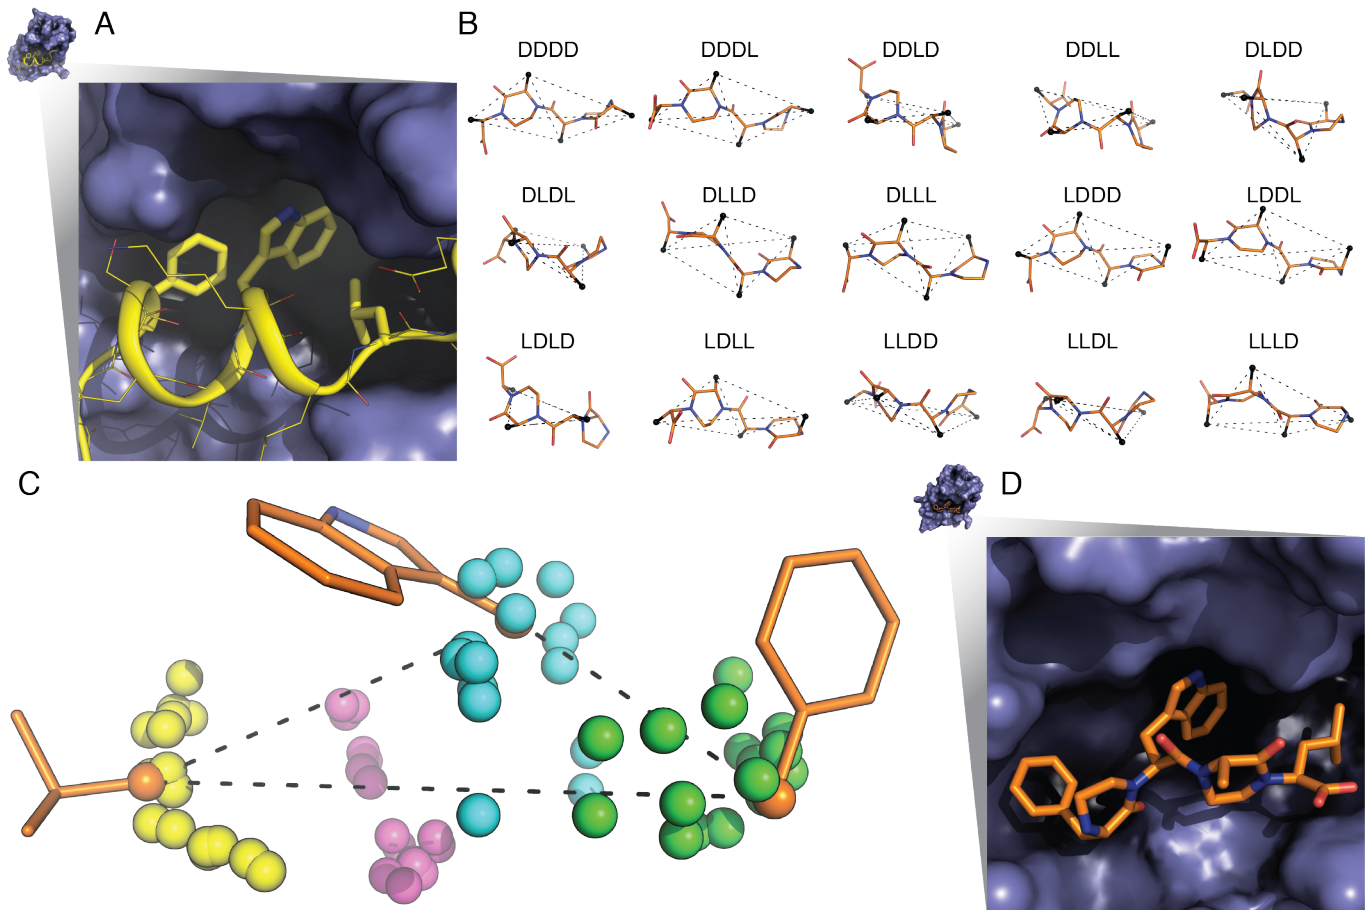

Fig. 1: (A) The P53 (yellow) and MDM2 (blue) interface showing phenylalanine, tryptophan, and leucine hotspot residues. (B) Fifteen of the sixteen OOP backbone scaffolds fit to hotspot residue stubs. Scaffolds combinatorially sample the L or D enantiomers of the four residues that comprise the OOP scaffold. Each backbone has four C $\beta$  atoms (black spheres) and thus four possibly matching triangles indicated by dashed lines. (C) The P53 hotspot residue stubs (orange). In this work, each hotspot residue has two  $\chi$  dihedral angles resulting in a single fixed C $\beta$  (orange spheres) triangle (dashed lines). Hotspot residues with additional  $\chi$  angles would produce multiple triangles. Colored spheres show potential C $\beta$  atoms from the OOP scaffolds for the first (green), second (cyan), third (magenta), fourth (yellow) residues in the scaffold. (D) The LLLL-OOP scaffold (orange) designed by Drew and coworkers and correctly identified by the algorithm bound to MDM2 (blue).

309 angles at the connecting atoms (eg. N, C $\alpha$ , and C $\beta$  for leucine) are within some error  
310 bound to the optimal bond angles.

---

**Algorithm 2** Scaffold Match ( $\{A_1, A_2, \dots, A_n\}, \{P_1, P_2, \dots, P_m\}, \delta, \delta_A$ )

---

```
results = []
2: for  $i = 1, \dots, m$  do
     $\{\tilde{P}_1, \tilde{P}_2, \dots, \tilde{P}_k\} = AdaptiveGeometricSearch(\{A_1, A_2, \dots, A_n\}, P_i, \delta)$ 
4:   for  $j = 1, \dots, k$  do
        $R_j = CalculateTransformation(\tilde{P}_j, P_i)$  # calculates the transformation
       matrix from  $P_i$  to  $\tilde{P}_j$ 
6:     if  $CheckAngle(R_j B_{P_i}, S_1, S_2, S_3)$  then
         results = results +  $[R_j B_{P_i}]$ 
8:     end if
   end for
10: end for
```

---

311 In this example let  $A_i$  be the manifold of possible positions of the connecting atom  
312 on the  $i$ -th hotspot residue. For example, in Fig. 4B points in colors are sampled from  
313 manifolds  $A_1, A_2$  and  $A_3$  respectively. Let  $P_j$  be the  $j$ -th polygon of the backbone  
314 take-off position combination and for example, there are  $4 \times 17$  of them in Fig. 4C. Let  
315  $B_P$  denote the atoms positions matrix corresponding to the backbone where the target  
316 polygon  $P$  comes from. Let  $S_i$  denote the atoms positions matrix for the  $i$ -th residue.  
317 Let  $\delta$  be the distance error bound and  $\delta_A$  be the angle error bound. Then we describe  
318 in pseudocode Algorithm 2. Let  $\mathcal{C}$  denote the time complexity for adaptive geometric  
319 search. Recall in Algorithm 2 that  $m$  is the number of target polygons from backbone  
320 take-off site combinations. Then the time complexity of the scaffold matching algorithm  
321 is  $\mathcal{O}(\mathcal{C}m)$ .

322 In the search process we scored all the possible matches by the root mean square  
323 deviation (RMSD) values for both shape match and angle match in Fig. 2. Our algo-  
324 rithm picked the candidate at the origin in this plot (this being identical to the correct  
325 conformation that led in Drew et al. to low nanomolar inhibitors of this interface). In  
326 Fig. 1D we show this best design for the OOP backbone of the hotspot residues. Testing  
327 this code as part of an Rosetta OOP-design protocol shows its energy score is a low  
328 4.67 with a potential energy score 4.59 after further minimization, which means this  
329 OOP-protein interface is likely very stable (verified experimentally in Drew et al). The  
330 run time for the initial geometric search (step on in this design protocol) is  $0.02 \sim 0.12$   
331 seconds using the algorithm described herein, whereas running the same design and  
332 producing the same results using the previously described Rosetta codes (the scripts  
333 from Drew et al.) takes  $\sim 18$  minutes (a speedup of greater than 9,000 fold).

### 324 3.2 Peptoid design: design of new metal binding sites

335 Proteins and other macromolecules often coordinate metal ions to aid conformational  
336 stability or carry out chemical reactions. Proteins that bind  $Zn^{2+}$  ions often use four  
337 residues (most often histidine, cystine, or aspartic acid) to coordinate the zinc ion in a  
338 tetrahedral arrangement[25]. We next tested our algorithm by designing a peptoid design  
339 for capturing zinc ions. The binding sites we target in this example are three sulphur  
340 atoms lying on the vertices of an equilateral triangle. A "6-mer" peptoid macrocycle  
341 was used as a template backbone (Fig. 3A).

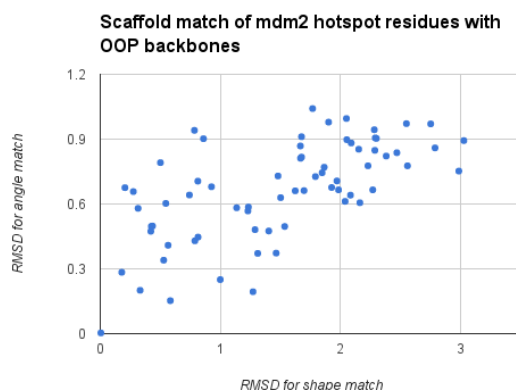

Fig. 2: RMSD (root mean square deviation) of all possible OOP backbone matches with the hotspot residues side chain positions. The candidate at the origin is a perfect match for both (shape and angle) to the hotspot residues we aim to minimize (use as a template for design) and is analogous to a template used in previously reported successful experimental designs.

342 A six residue cyclic peptoid composed of alternating sarcosine and 3-aminopropyl-  
343 1-thiol side chains. The cyclization directs alternating side chains to opposite faces of  
344 the cycle.

345 The search space includes 6-mer, 8-mer, and 9-mer scaffolds (peptoid data bank  
346 codes 07AA1-6-C, 07AA2-8-C[26], and 12AC2-9-C[27] respectively) as the backbone  
347 and 3-aminopropyl-1-thiol groups as side chains of residues (Fig. 3). Low energy  
348 matches were commonly found to be comprised of alternating residue positions, or  
349 sequential positions on the narrow end of the macrocycle.

350 We sampled 8 dihedral angles per atom with different lengths of side chains( $n =$   
351 number of carbon atoms), different error values. We recorded the run time to find the  
352 first valid target polygon on Intel Core 3.5 GHz. Results recorded in seconds of CPU  
353 run time.

### 354 3.3 Long loop closure

355 Loop closure is an increasingly researched field in protein design mainly due to impactful  
356 applications including antibody designs [9, 10]. The abstraction of the problem can  
357 be described as follows. Given two fixed points in 3D called pivots and two vectors  
358 (the take-off vectors), construct the loop from pivot 1 to pivot 2 with  $k$  residues with  
359 the type N-C $\alpha$ -C such that the loop has a low energy and it fits in the designated space.  
360 Typically the number of residues  $k$  ranges from 9 to 17. The difficulties of the problem  
361 using a direct computation stem from exponential growth in the number of possible loop  
362 conformations as a function of loop length. As illustrated in Fig. 5.5, we divide the loop  
363 into two semi-loops by the midpoint or the closest point to the midpoint between two  
364 residues. The designated space where the loop resides within can be discretised into  
365 cubes of a certain size (the "lattice space" in Fig. 5.5). We precompute all conformations  
366 of a single residue and store the resulting angles and x,y,z coordinates after discretisation  
367 and encoded as a unique integer. Then we compute and store the table where two residue  
368 conformations can connect appropriately, that is, the end atom of one residue and the

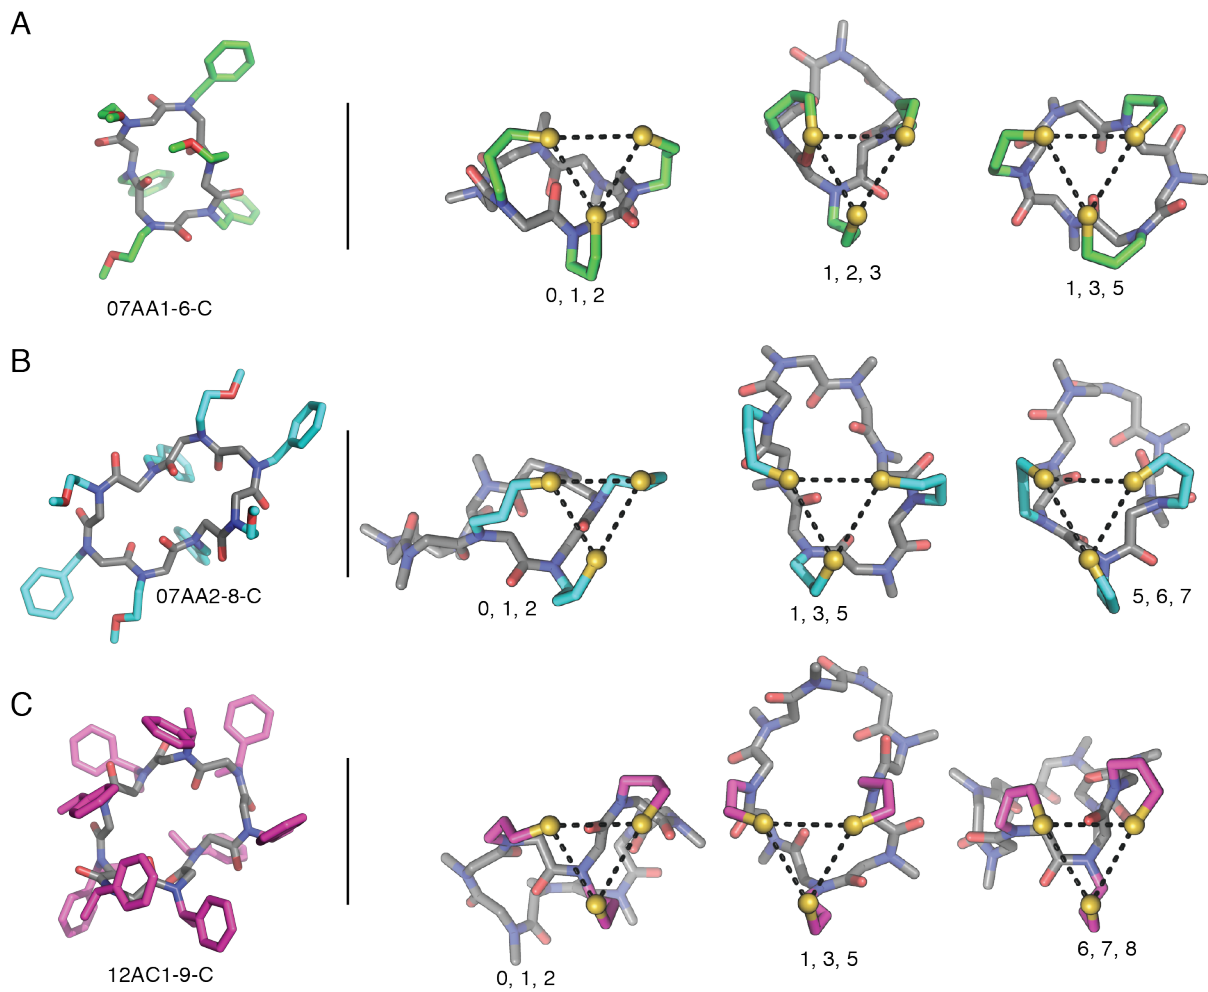

Fig. 3: Experimentally determined peptoid macrocycle structures and representative examples of low energy matches for the (A) 07AA1-6-C (B) 07AA2-8-C and (C) 12AC1-9-C peptoid macrocycle backbone scaffolds. Numbers under representative examples indicate residue position of 3-aminopropyl-1-thiol side chain.

Table 1: Run times for matching different geometric representations of metal binding sites to a library of peptoid (peptidomimetic) scaffolds. Run times are shown in seconds for runs computed on an Intel Core 5 3.5 GHz processor. Run times are shown for three classes of binding site pattern and for various user defined settings (corresponding to different allowable error and approximation ranges in atomic units).

| err                   | 0.05   |        |        | 0.1    |        |        | 0.5     |         |         |     |
|-----------------------|--------|--------|--------|--------|--------|--------|---------|---------|---------|-----|
|                       | $\eta$ | 0.1    | 0.2    | 0.3    | 0.1    | 0.2    | 0.3     | 0.1     | 0.2     | 0.3 |
| General Triangle:     |        |        |        |        |        |        |         |         |         |     |
| $n = 2$               | 2.69   | 2.42   | 2.49   | 2.92   | 2.40   | 2.50   | 7.81    | 6.93    | 6.97    |     |
| $n = 3$               | 76.64  | 73.56  | 67.87  | 106.96 | 101.12 | 91.04  | 1518.47 | 1357.48 | 1178.47 |     |
| Equilateral triangle: |        |        |        |        |        |        |         |         |         |     |
| $n = 2$               | 5.43   | 5.12   | 4.78   | 5.41   | 4.47   | 4.37   | 5.29    | 4.10    | 3.93    |     |
| $n = 3$               | 181.04 | 161.34 | 139.75 | 175.37 | 151.46 | 124.03 | 272.62  | 223.75  | 176.27  |     |
| General 4-gon:        |        |        |        |        |        |        |         |         |         |     |
| $n = 2$               | 7.63   | 7.06   | 7.15   | 7.75   | 7.33   | 7.47   | 9.67    | 8.67    | 8.82    |     |
| $n = 3$               | 224.16 | 218.69 | 209.19 | 271.98 | 254.81 | 235.12 | 3262.67 | 2780.21 | 2079.59 |     |

369 beginning atom of the other residue lie in the same cube and the two bonds form an  
 370 angle within the error bound from the optimal bond angle. Now using the precomputed  
 371 residue conformations and matching table, we develop the two semi-loops. Let the  
 372 number of residue conformations be  $M_r$  and the number of cubes in the lattice space  $M_c$ .  
 373 After developing each residue, we collapse the end positions that fall into the same cube  
 374 and sharing the same last bond angle, and store all intermediate results for the purpose  
 375 of producing final results in backtracking. After the two semi-loops are developed,  
 376 we have the end atoms of both sides and their spatial intersections. The angles are  
 377 checked to eliminate from the intersection cubes those that deviate outside the error  
 378 bound from the optimal bond angle there (Fig. 5.6). Starting from the matched cubes  
 379 in the middle of the loop, now we backtrack in both sides to the pivots and produce as  
 380 many results as desired (effectively allowing for efficient sampling of a large number of  
 381 constraint-compliant loop designs). In the first experiment we computed a 12-residue  
 382 loop, developing 1000 conformations for each residue and 121 by 121 by 121 cubes  
 383 in the designated space, setting cube length to 0.1 and maximum bond angle errors to  
 384 within 0.2 rad. On a 1.3 GHz Intel Core M with 8 GB memory, our algorithm ran a  
 385 total of 3.6 minutes to produce the first result (see Fig. 5.7 for sample results.). The  
 386 development of each semi-loop took 82 seconds and the matching in the middle took 20  
 387 seconds. Keeping the number of conformations per residue, error bounds and the cube  
 388 size, we enlarge the number of cubes to 171 by 171 by 171 to compute for 17-residue  
 389 loops. On a 2.0 GHz Intel Xeon E5-2620 CPU with 128 GB memory, our algorithm ran  
 390 a total of 35.5 minutes to produce the first result (see Fig. 5.8 for sample results). The  
 391 development of each semi-loop took 11 minutes and the matching in the middle took 28  
 392 seconds.

## 393 4 Discussion

394 We have presented an adaptive method for finding matches between target geometric  
395 patterns (that represent protein and peptidomimetic design goals) and scaffolds (which  
396 can serve as the biosynthetic or organic synthesis method for positioning side chains  
397 in the desired/target geometry). In the protein, enzyme, and peptidomimetic design  
398 communities, these geometric search tasks are increasingly becoming limiting steps  
399 in design processes. This trend will increase as we scale to larger target patterns  
400 and as we compare to growing databases of proteins, peptidomimetic structures and  
401 other scaffolds. We have tested our adaptive octree method in three realistic design  
402 settings (each one adapted from a recent design paper using geometric target-scaffold or  
403 geometric matching) and in each case we were able to speed up the required calculation  
404 by 100 to 10,000 fold over previous methods. These speedups allow us to replace  
405 poorly scaling heuristics with our algorithm and thus guarantee scaling and run times  
406 in a wide variety of design tasks. In addition, our algorithm allows for an explicit  
407 specification of allowable error rates and mismatches (built into both the search and  
408 the initial construction of the core octree data-structure). Future work could include  
409 providing a better interface to the specification of error and allowable mismatches,  
410 resulting in a mismatch tolerant geometric search (akin to gaps in sequence alignments).  
411 Another area for future work would be to adapt our geometric search to a multiple-  
412 alignment setting, allowing us, for example, to seed a search and subsequently update  
413 the parameters of the search to reflect families of discovered sites on proteins. This  
414 would provide an algorithmic framework for iterative construction of functional sites on  
415 proteins that would be informed (in a data-driven manner) by geometric variation across  
416 discovered functional sites.

417 An immediate advantage of our improvement in computational efficiency is that  
418 it expands, by improving scaling, the range and types of peptidomimetic and protein  
419 scaffolds that can be explored. For example, our method dramatically increases the  
420 maximum pattern (active site to match to potential scaffolds) that can be engrafted  
421 via matching. This is important for enzyme design and catalysis design, as full sites  
422 that include substrate binding and catalytic sites can include large numbers of side  
423 chains (large numbers of component vectors in the template/starting geometric pattern  
424 to be matched/searched)[5, 6]. The design of protein binding sites can also involve  
425 large target patterns that challenge previous methods. Our work here opens the door  
426 to a more efficient approach to designing these larger patterns and also offers better  
427 algorithmic guarantees than previous heuristics. Our examples here show (presented  
428 above and as supplemental code) integration with the Rosetta design framework and  
429 thus demonstrate how one might integrate our method with a very wide variety of  
430 design tasks including protein interface antagonist design, protein interface engraftment,  
431 enzyme design, peptidomimetic design, and the engraftment of complex metal binding  
432 sites onto target proteins[21, 28]. The computational efficiency of our algorithm also  
433 enables new approaches where geometric matching is integrated more tightly with  
434 design protocols (for example, integrated into inner search loops instead of simply being  
435 performed to set up initial poses or discover starting scaffolds for a design run). The  
436 code is freely available as a set of python scripts ([https://github.com/JiangTian/adaptive-  
437 geometric-search-for-protein-design](https://github.com/JiangTian/adaptive-geometric-search-for-protein-design)).

## 438 5 Acknowledgments

439 The authors thank the NYU high performance IT computing team. We thank Ian  
440 Fisk and Nicholas Carriero of the Simons Foundation for discussion and help with  
441 computing. The authors acknowledge the support of the Simons Foundation, the NIH,  
442 the NSF and NYU for supporting this research, particularly NSF: MCB-1158273, IOS-  
443 1339362, MCB-1412232, MCB-1355462, IOS-0922738, MCB-0929338, and NIH:  
444 2R01GM032877-25A1. We also thank Professor Saurabh Ray of NYU Abu Dhabi for  
445 his insights into the state of the art in computational geometry.

## 446 References

- 447 1. Kuhlman, B. *et al.* Design of a Novel Globular Protein Fold with Atomic-Level  
448 Accuracy. *Science* **302** (2003).
- 449 2. Dantas, G., Kuhlman, B., Callender, D., Wong, M. & Baker, D. A Large Scale  
450 Test of Computational Protein Design: Folding and Stability of Nine Completely  
451 Redesigned Globular Proteins. *Journal of Molecular Biology* **332**, 449–460 (2003).
- 452 3. Boyken, S. E. *et al.* De novo design of protein homo-oligomers with modular  
453 hydrogen-bond network-mediated specificity. *Science* **352** (2016).
- 454 4. Ashworth, J. *et al.* Computational redesign of endonuclease DNA binding and  
455 cleavage specificity. *Nature* **441**, 656–9 (June 2006).
- 456 5. Jiang, L. *et al.* De Novo Computational Design of Retro-Aldol Enzymes. *Science*  
457 **319** (2008).
- 458 6. Röthlisberger, D. *et al.* Kemp elimination catalysts by computational enzyme  
459 design. *Nature* **453**, 190–195 (May 2008).
- 460 7. Holm, L. & Laakso, L. M. Dali server update. *Nucleic Acids Research* **44**, W351–  
461 W355 (July 2016).
- 462 8. Bonneau, R. *et al.* De Novo Prediction of Three-dimensional Structures for Major  
463 Protein Families. *Journal of Molecular Biology* **322**, 65–78 (2002).
- 464 9. R Nussinov, H. J. W. Efficient detection of three-dimensional structural motifs  
465 in biological macromolecules by computer vision techniques. *Proceedings of the*  
466 *National Academy of Sciences of the United States of America* **88**, 10495 (1991).
- 467 10. Fischer, D., Nussinov, R. & Wolfson, H. J. 3-D Substructure Matching in Protein  
468 Molecules.
- 469 11. Wallace, A. C., Borkakoti, N. & Thornton, J. M. Tess: A geometric hashing  
470 algorithm for deriving 3D coordinate templates for searching structural databases.  
471 Application to enzyme active sites. *Protein Science* **6**, 2308–2323 (Dec. 2008).
- 472 12. Fleishman, S. J. *et al.* Computational Design of Proteins Targeting the Conserved  
473 Stem Region of Influenza Hemagglutinin. *en. Science* **332**, 816–821 (May 2011).
- 474 13. Pacella, M. S., Koo, D. C. E., Thottungal, R. A. & Gray, J. J. in *Methods in*  
475 *Enzymology* 343–366 (2013).
- 476 14. Zuckermann, R. N., Kerr, J. M., Kent, S. B. H. & Moos, W. H. Efficient method for  
477 the preparation of peptoids [oligo(N-substituted glycines)] by submonomer solid-  
478 phase synthesis. *Journal of the American Chemical Society* **114**, 10646–10647  
479 (Dec. 1992).

- 480 15. Tošovská, P., Arora, P. S., Tosovská, P. & Arora, P. S. Oligoaxopiperazines as  
481 nonpeptidic alpha-helix mimetics. *Organic letters* **12**, 1588–1591 (2010).
- 482 16. Chapman, R. N., Dimartino, G. & Arora, P. S. A highly stable short  $\alpha$ -helix  
483 constrained by a main-chain hydrogen-bond surrogate. *Journal of the American*  
484 *Chemical Society* **126**, 12252–12253 (2004).
- 485 17. Bhardwaj, G. *et al.* Accurate de novo design of hyperstable constrained peptides.  
486 *Nature* **538**, 329–335 (Sept. 2016).
- 487 18. Yoo, B., Shin, S. B. Y., Huang, M. L. & Kirshenbaum, K. Peptoid Macrocycles:  
488 Making the Rounds with Peptidomimetic Oligomers. *Chemistry - A European*  
489 *Journal* **16**, 5528–5537 (May 2010).
- 490 19. Molski, M. A. *et al.* Remodeling a  $\beta$ -peptide bundle. *Chem. Sci.* **4**, 319–324  
491 (2013).
- 492 20. Watkins, A. M. & Arora, P. S. Structure-based inhibition of protein-protein inter-  
493 actions (2015).
- 494 21. Lao, B. B. *et al.* Rational Design of Topographical Helix Mimics as Potent In-  
495 hibitors of Protein-Protein Interactions. *Journal of the American Chemical Society*  
496 **136**, 7877–7888 (2014).
- 497 22. Drew, K. *et al.* Adding Diverse Noncanonical Backbones to Rosetta: Enabling  
498 Peptidomimetic Design. *PLoS ONE* **8** (2013).
- 499 23. Guichard, G. & Huc, I. Synthetic foldamers. *Chemical Communications* **47**, 5933  
500 (2011).
- 501 24. De Berg, M., Cheong, O., van Kreveld, M. & Overmars, M. *Computational*  
502 *Geometry* 3rd, 307–322 (Springer Berlin Heidelberg, Berlin, Heidelberg, 2008).
- 503 25. Hsin, K., Sheng, Y., Harding, M. M., Taylor, P. & Walkinshaw, M. D. MESPEUS:  
504 A database of the geometry of metal sites in proteins. *Journal of Applied Crystal-*  
505 *lography* **41**, 963–968 (2008).
- 506 26. Shin, S. B. Y., Yoo, B., Todaro, L. J. & Kirshenbaum, K. Cyclic Peptoids. *Journal*  
507 *of the American Chemical Society* **129**, 3218–3225 (Mar. 2007).
- 508 27. Butterfoss, G. L. *et al.* De novo structure prediction and experimental charac-  
509 terization of folded peptoid oligomers. *Proceedings of the National Academy of*  
510 *Sciences* **109**, 14320–14325 (Sept. 2012).
- 511 28. Leaver-Fay, A. *et al.* ROSETTA 3 : An Object-Oriented Software Suite for the  
512 Simulation and Design of Macromolecules. *Methods in Enzymology, Volume 487*  
513 **487**, 545–574 (2011).



## 514 A Appendix

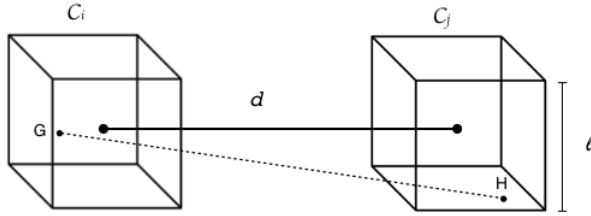

Fig. 4: Cubes  $C_i, C_j$  of size  $\ell$  that are  $d$  distance apart.

515 **Theorem 1:** If  $d < P_i P_j - \epsilon_T - \sqrt{3} \ell$  or  $d > P_i P_j + \epsilon_T + \sqrt{3} \ell$ , then there are no pairs  
 516 of points  $(G, H) \in C_i \times C_j$  such that  $|GH - P_i P_j| \leq \epsilon_T$ .

517 *Proof.* For any two points  $G \in C_i, H \in C_j$  as shown in Figure 4, if  $d < P_i P_j - \epsilon_T -$   
 518  $\sqrt{3} \ell$ , by the triangle inequality we have,

$$GH \leq d + \sqrt{3} \ell < P_i P_j - \epsilon_T - \sqrt{3} \ell + \sqrt{3} \ell = P_i P_j - \epsilon_T.$$

519 If  $d > P_i P_j + \epsilon_T + \sqrt{3} \ell$ , again by the triangle inequality,

$$GH \geq d - \sqrt{3} \ell > P_i P_j + \epsilon_T + \sqrt{3} \ell + \sqrt{3} \ell - \sqrt{3} \ell = P_i P_j + \epsilon_T.$$

520

□

521 **Theorem 2** If  $P_i P_j - \epsilon_T + \sqrt{3} \ell \leq d \leq P_i P_j + \epsilon_T - \sqrt{3} \ell$ , then all pairs of points  
 522  $(G, H) \in C_i \times C_j$  satisfy  $|GH - P_i P_j| \leq \epsilon_T$ .

523 *Proof.* As shown in Figure 4, for any points  $G \in C_i, H \in C_j$ , we have  $d - \sqrt{3} \ell \leq$   
 524  $GH \leq d + \sqrt{3} \ell$ . If  $P_i P_j - \epsilon_T + \sqrt{3} \ell \leq d \leq P_i P_j + \epsilon_T - \sqrt{3} \ell$ . Substituting the tighter  
 525 bound of  $d$  on each side of the inequality we have  $P_i P_j - \epsilon_T \leq GH \leq P_i P_j + \epsilon_T$ . □

### 526 Theorem 3

527 If we set  $\ell_s = \eta \frac{\epsilon_T}{4\sqrt{3}}$  for any  $0 < \eta < 1$ , then the adaptive geometric search  
 528 algorithm 1 returns all the pairs of points whose distances are within the set  $[\ell^* - (1 -$   
 529  $\eta)\epsilon_T, \ell^* + (1 - \eta)\epsilon_T]$ , and some but possibly not all the pairs of points whose distances  
 530 are within the set  $[\ell^* - \epsilon_T, \ell^* - (1 - \eta)\epsilon_T] \cup (\ell^* + (1 - \eta)\epsilon_T, \ell^* + \epsilon_T]$ .

531 *Proof.* Let  $\ell_T$  be the length of the leaf cubes. By the definition of  $\ell_s$ , we have  $\ell_T <$   
 532  $2\ell_s = \eta \frac{\epsilon_T}{2\sqrt{3}}$ . Thus  $\ell_T < \epsilon_T / \sqrt{3}$  and the sufficient condition A can be tested. If the  
 533 sufficient condition A is rejected on a pair of cubes  $C_1, C_2$ , then the distance  $d$  between  
 534 them satisfies  $d > \ell^* + \epsilon_T - \sqrt{3} \ell_T$  or  $d < \ell^* - \epsilon_T + \sqrt{3} \ell_T$ . Let  $G, H$  be any two  
 535 points such that  $G \in C_1, H \in C_2$ . By the triangle inequality, we have

$$GH \geq d - \sqrt{3} \ell_T > \ell^* + \epsilon_T - 2\sqrt{3} \ell_T > \ell^* + (1 - \eta)\epsilon_T,$$

536 OR

$$GH \leq d + \sqrt{3} \ell_T < \ell^* - \epsilon_T + 2\sqrt{3} \ell_T < \ell^* - (1 - \eta)\epsilon_T.$$

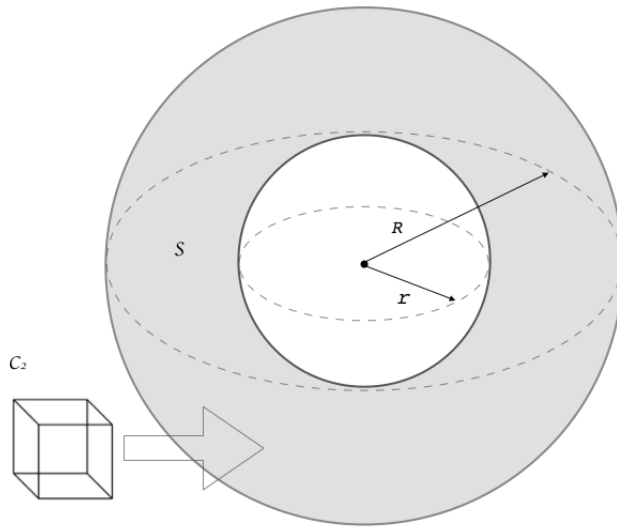

Fig. 5: An illustration for Lemma A. The outer radius  $R = \ell^* + \sqrt{3}\ell + \epsilon_T + \frac{\sqrt{3}}{2}\ell$ , and the inner radius  $r = \ell^* - \sqrt{3}\ell - \epsilon_T - \frac{\sqrt{3}}{2}\ell$ . Let  $\mathcal{S}$  denote the spherical shell (in shade). How many cubes  $\mathcal{C}_2$  can fit into  $\mathcal{S}$ ?

537 Therefore, in rejecting all pairs of points in  $\mathcal{C}_1 \times \mathcal{C}_2$  we may have rejected some pairs  
 538 of points whose distances are within the set  $[\ell^* - \epsilon_T, \ell^* - (1 - \eta)\epsilon_T] \cup (\ell^* + (1 -$   
 539  $\eta)\epsilon_T, \ell^* + \epsilon_T]$ .  $\square$

540 **Lemma 4** Set  $\ell_s = \eta \frac{\epsilon_T}{4\sqrt{3}}$  for some  $0 < \eta < 1$ . Then for any cube  $\mathcal{C}_1$  in an octree  $t_1$ ,  
 541 there are at most  $\frac{4\pi}{3} (3\sqrt{3} + 2\frac{4\sqrt{3}}{\eta}) \left( 3(\frac{\ell^*}{\ell_s})^2 + (\frac{3\sqrt{3}}{2} + \frac{4\sqrt{3}}{\eta})^2 \right)$  cubes  $\mathcal{C}_2$  on the same  
 542 level from another octree  $t_2$  such that  $(\mathcal{C}_1, \mathcal{C}_2)$  are possible pairs, that is, they satisfy the  
 543 necessary condition 1.

*Proof.* For any cube  $\mathcal{C}_1$  in  $t_1$ , let  $\ell$  be the length of  $\mathcal{C}_1$ . For any possible cube  $\mathcal{C}_2$  on the same level from  $t_2$ , by the necessary condition A the distance between them  $d$  must satisfy that  $\ell^* - \sqrt{3}\ell - \epsilon_T \leq d \leq \ell^* + \sqrt{3}\ell + \epsilon_T$ . Thus all possible cubes  $\mathcal{C}_2$  must be contained in the spherical shell  $\mathcal{S}$  of inner radius  $\ell^* - \sqrt{3}\ell - \epsilon_T - \frac{\sqrt{3}}{2}\ell$  and outer radius  $\ell^* + \sqrt{3}\ell + \epsilon_T + \frac{\sqrt{3}}{2}\ell$  (see Figure 5). Since there are no overlapping cubes on the same level in  $t_2$ , the maximum number of the possible cubes  $n_m$  satisfies

$$\begin{aligned} n_m &\leq \frac{\text{Vol}(\mathcal{S})}{\text{Vol}(\mathcal{C}_2)} \\ &\leq \frac{4\pi}{3\ell^3} (\ell^* + \sqrt{3}\ell + \epsilon_T + \frac{\sqrt{3}}{2}\ell)^3 \\ &\quad - \frac{4\pi}{3\ell^3} (\ell^* - \sqrt{3}\ell - \epsilon_T - \frac{\sqrt{3}}{2}\ell)^3 \\ &\leq \frac{4\pi}{3\ell^3} (3\sqrt{3}\ell + 2\epsilon_T) \left( 3(\ell^*)^2 + (\frac{3\sqrt{3}}{2}\ell + \epsilon_T)^2 \right) \end{aligned}$$

$$\begin{aligned}
 &\leq \frac{4\pi}{3} (3\sqrt{3} + 2\frac{\epsilon_T}{\ell}) \left( 3\left(\frac{\ell^*}{\ell}\right)^2 + \left(\frac{3\sqrt{3}}{2} + \frac{\epsilon_T}{\ell}\right)^2 \right) \\
 &\leq \frac{4\pi}{3} (3\sqrt{3} + 2\frac{\epsilon_T}{\ell_s}) \left( 3\left(\frac{\ell^*}{\ell_s}\right)^2 + \left(\frac{3\sqrt{3}}{2} + \frac{\epsilon_T}{\ell_s}\right)^2 \right) \\
 &= \frac{4\pi}{3} (3\sqrt{3} + 2\frac{4\sqrt{3}}{\eta}) \left( 3\left(\frac{\ell^*}{\ell_s}\right)^2 + \left(\frac{3\sqrt{3}}{2} + \frac{4\sqrt{3}}{\eta}\right)^2 \right).
 \end{aligned}$$

544

□

545 **Theorem 5:** Recall that  $\ell_0$  denotes the initial cube length and the minimum cube  
 546 length  $\ell_s = \eta \frac{\epsilon_T}{4\sqrt{3}}$ . Let  $n_m$  be defined as in Lemma A. Then the time complexity of the  
 547 adaptive search part of Algorithm 1 is  $\mathcal{O}\left(\frac{1}{\eta^6 \epsilon_T^5}\right)$ .

548 *Proof.* Let  $d$  be the depth of the octrees  $t_1, t_2$ . Let  $\psi_k(t)$  be the number of nodes on  
 549 the  $k$ -th level in the octree  $t_1$ . Recall that  $\ell_0$  denotes the length of the root cubes of the  
 550 octrees  $t_1, t_2$ . Since all the cubes have the minimum length  $\ell_s$ , we have  $\ell_0/2^d \geq \ell_s$ , or  
 551  $d \leq \log_2(\ell_0/\ell_s)$ . By Lemma 4, the total number of computations  $\mathcal{N}$  satisfies

$$\begin{aligned}
 \mathcal{N} &= \mathcal{O}(\psi_1(t_1)\psi_1(t_2) + n_m \times 64 \sum_{k=1}^{d-1} \psi_k(t_1)) \\
 &= \mathcal{O}(n_m \sum_{k=1}^{d-1} \psi_k(t_1)) = \mathcal{O}(n_m \sum_{k=1}^{d-1} 8^k) \\
 &= \mathcal{O}(n_m 8^d) = \mathcal{O}(n_m 8^{\log_2(\ell_0/\ell_s)}) = \mathcal{O}(n_m (\ell_0/\ell_s)^3) \\
 &= \mathcal{O}\left[\frac{4\pi}{3} (3\sqrt{3} + 2\frac{4\sqrt{3}}{\eta}) \left( 3\left(\frac{\ell^*}{\ell_s}\right)^2 + \left(\frac{3\sqrt{3}}{2} + \frac{4\sqrt{3}}{\eta}\right)^2 \right) \left(\frac{\ell_0}{\ell_s}\right)^3\right] \\
 &= \mathcal{O}\left(\frac{1}{\eta \ell_s^5} + \frac{1}{(\eta \ell_s)^3}\right) \\
 &= \mathcal{O}\left(\frac{1}{\eta^6 \epsilon_T^5} + \frac{1}{\eta^6 \epsilon_T^3}\right) \\
 &= \mathcal{O}\left(\frac{1}{\eta^6 \epsilon_T^5}\right).
 \end{aligned}$$

552

□
